# Supplementary material for: Broadly neutralizing antibodies overcome SARS-CoV-2 Omicron antigenic shift
Source: Springer Nature journal article supplement (doi:10.1038/s41586-021-04386-2), 2021-12-23
Supplement: 41586_2021_4386_MOESM1_ESM.pdf [file 41586_2021_4386_MOESM1_ESM.pdf]

---

**Supplementary information**

---

**Broadly neutralizing antibodies overcome SARS-CoV-2 Omicron antigenic shift**

---

In the format provided by the authors and unedited

**a**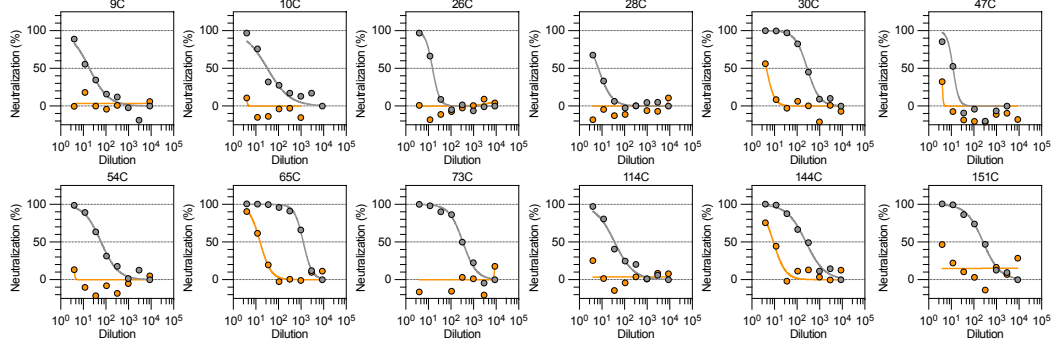**b**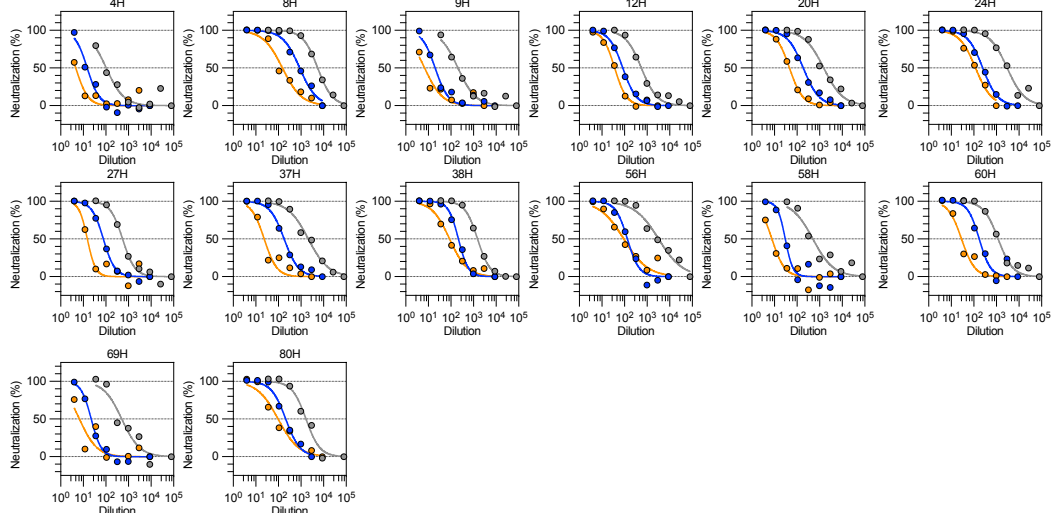**c**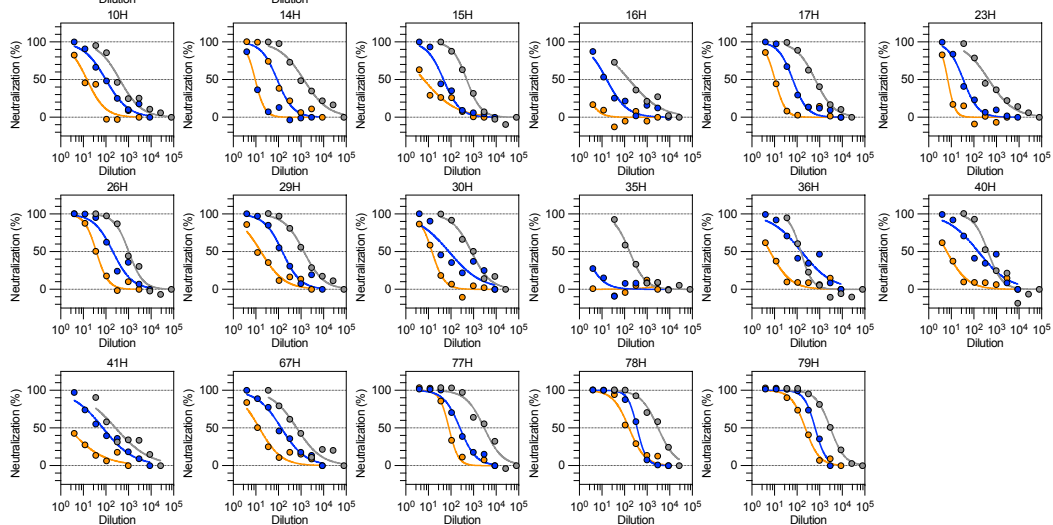**d**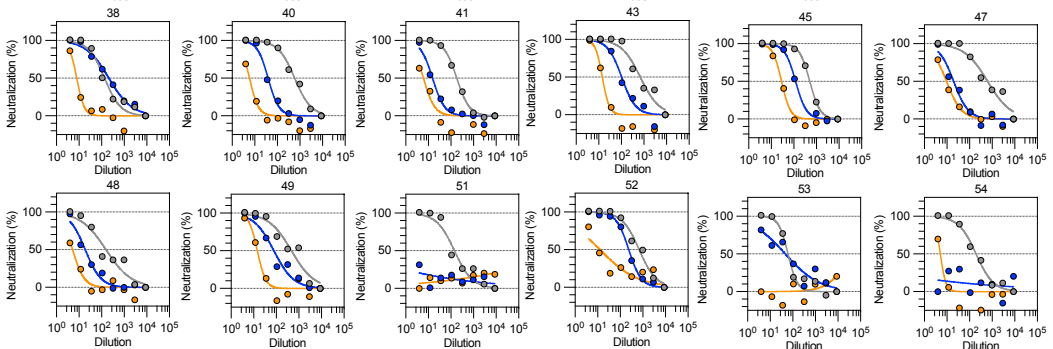

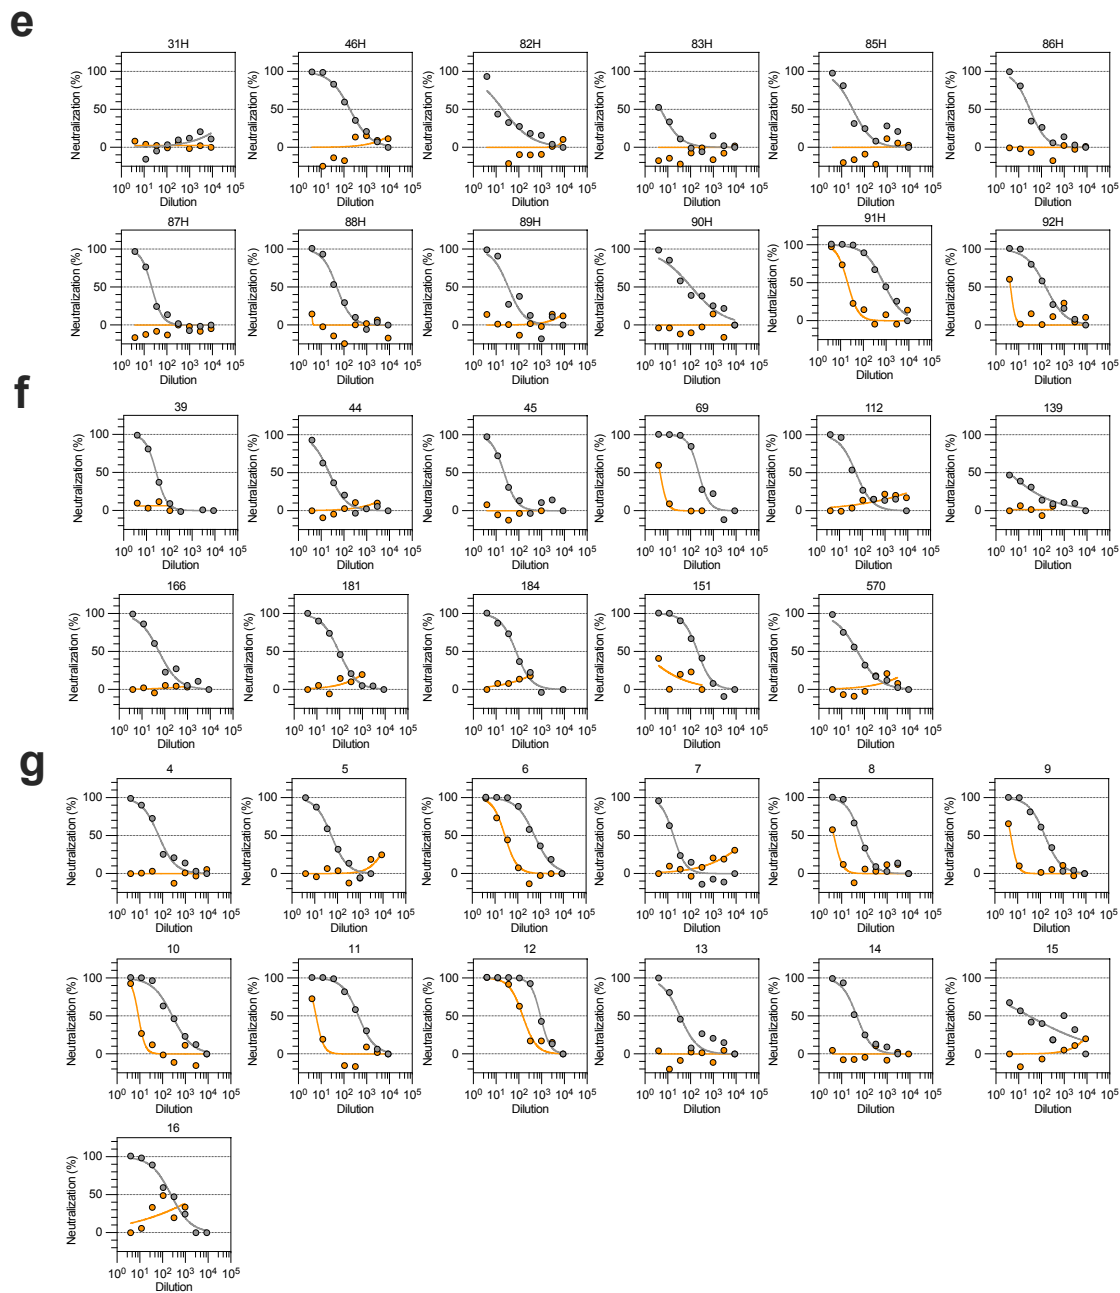

**Supplementary Fig. 1. Neutralization of WT and Omicron S pseudotyped SARS-CoV-2 virus neutralization by plasma from COVID-19 convalescent and vaccinated individuals.** Neutralization of SARS-CoV-2 pseudotyped VSV carrying Wuhan-Hu-1 D614G (grey), Beta (blue) or Omicron (orange) S protein by plasma from convalescent (a) or vaccinated individuals (b, mRNA-1273; c, BNT162b2; d, ChAdOx1; e, Ad26.COV2.S; f, Sputnik V; g, BBIBP-CorV) as shown in Fig. 2a. Data are representative of  $n = 2$  independent experiments.

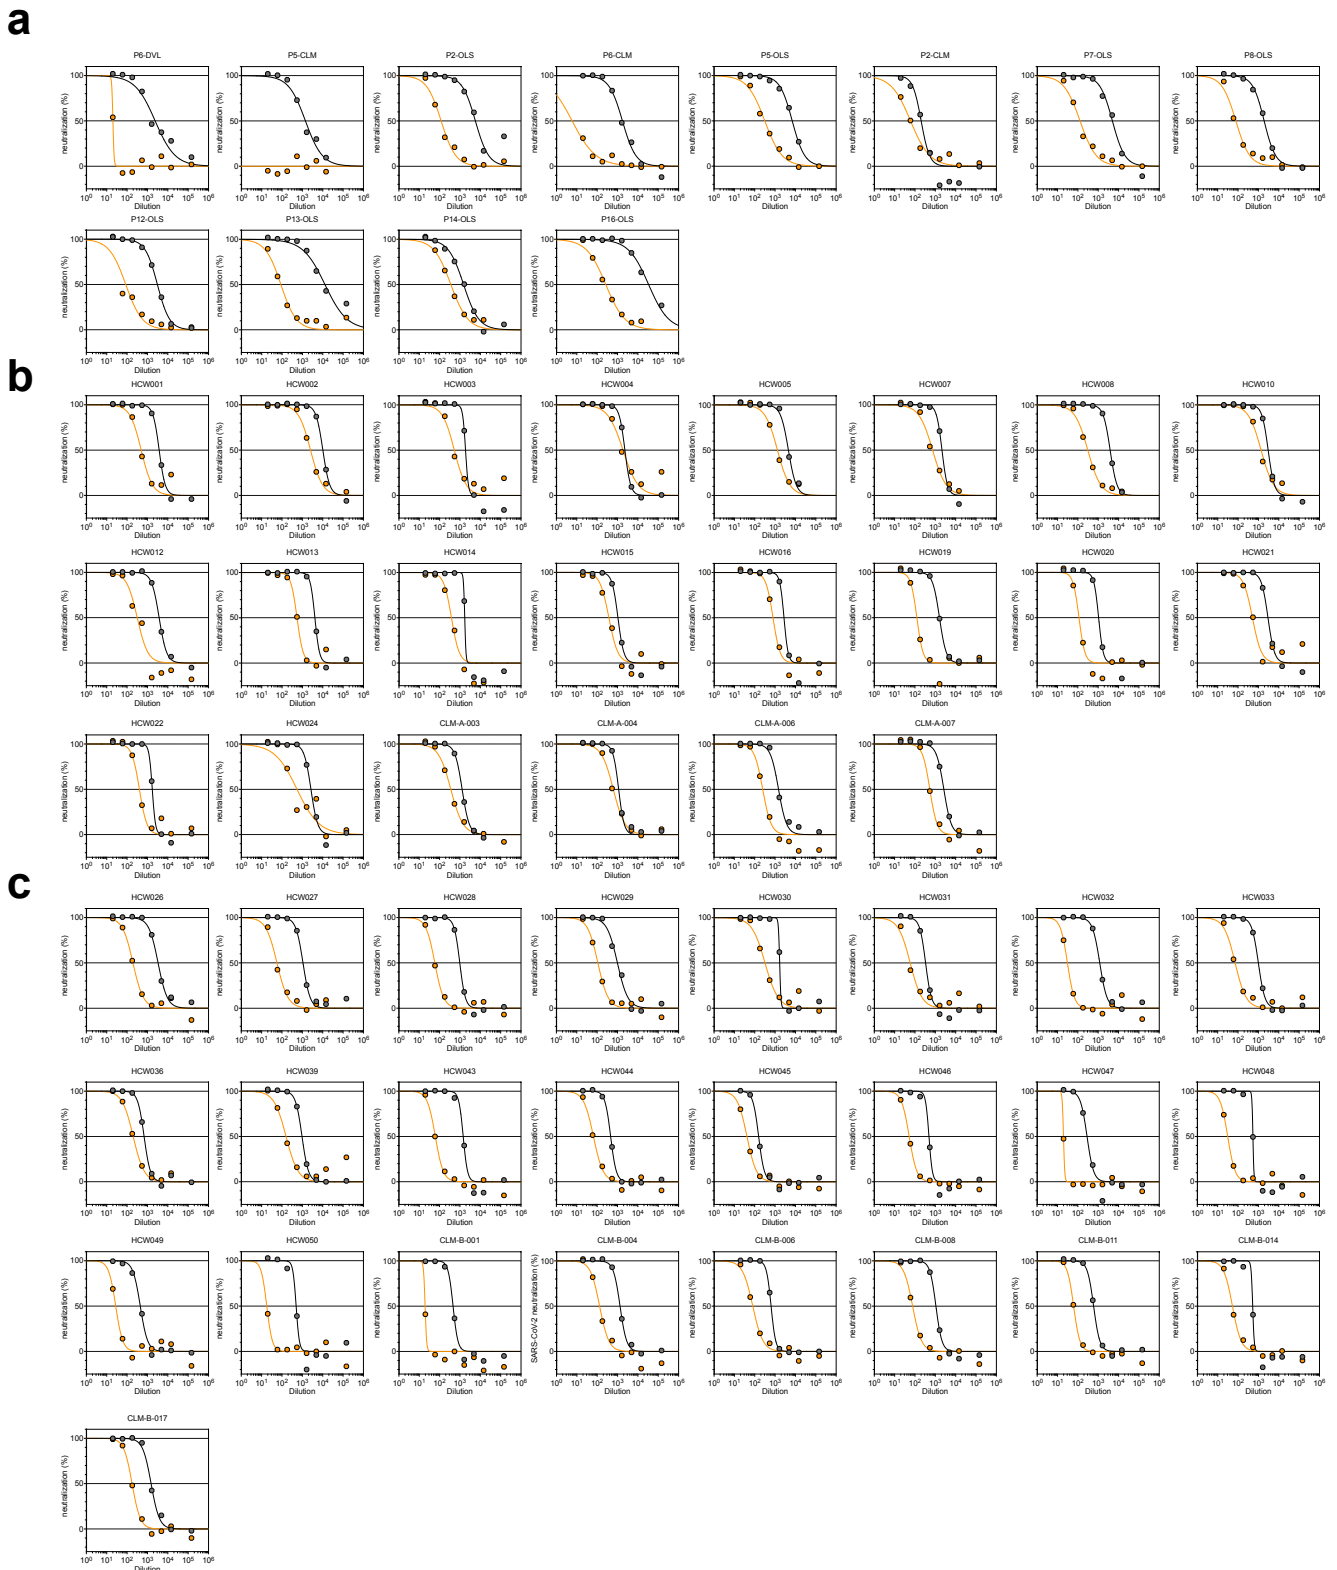

**Supplementary Fig. 2. Neutralization of WT and Omicron S pseudotyped SARS-CoV-2 virus neutralization by plasma from COVID-19 convalescent and vaccinated individuals.** a-c, Neutralization of SARS-CoV-2 pseudotyped VSV carrying Wuhan-Hu-1 or Omicron S protein by plasma from convalescent individuals 2-4 weeks after infection by WT SARS-CoV-2 (a, 11 out of 12 individuals were hospitalized for COVID-19), and previously infected (b) or naïve (c) individuals, 2-4 weeks after receiving the second dose of BNT162b2 mRNA vaccine. Data are representative of  $n = 2$  independent experiments.

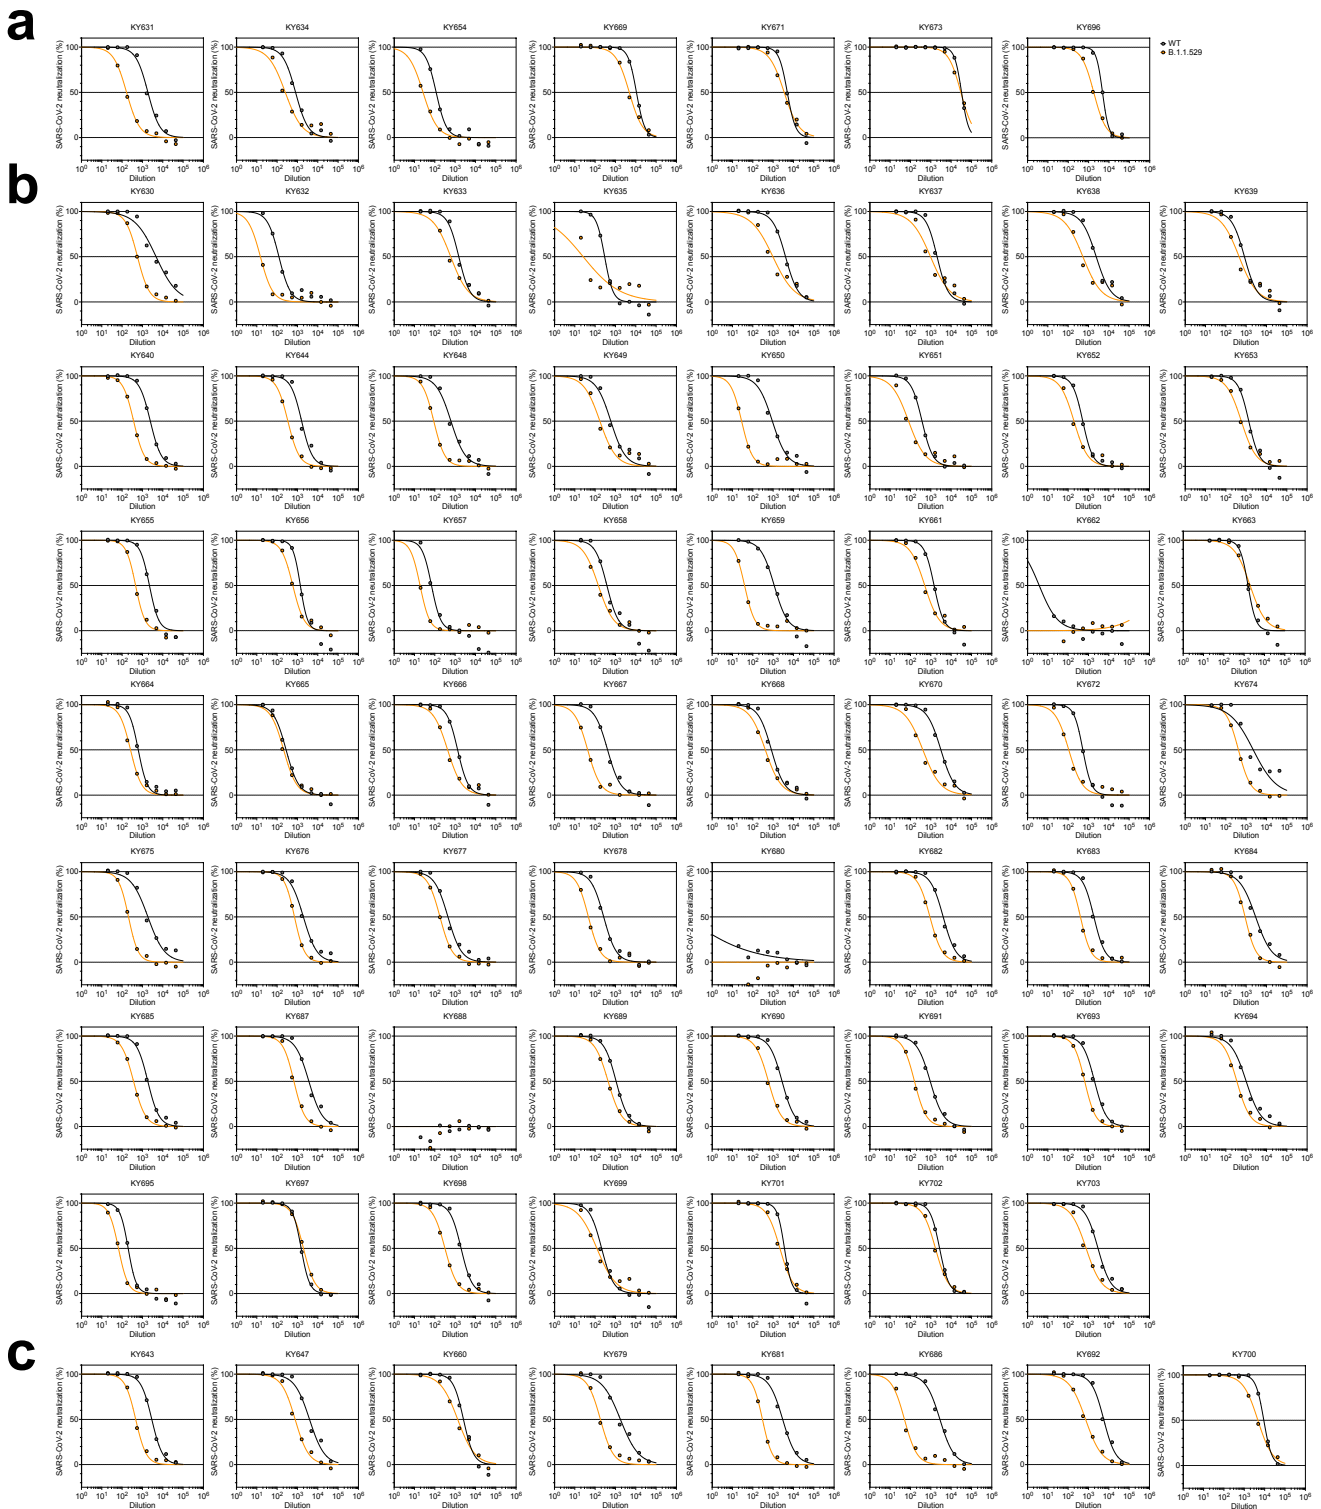

**Supplementary Fig. 3. Neutralization of WT and Omicron S pseudotyped SARS-CoV-2 by plasma from vaccinated dialysis patients.** a-c, Neutralization of SARS-CoV-2 pseudotyped VSV carrying Wuhan-Hu-1 or Omicron S protein by plasma from convalescent dialysis patients 2-4 weeks after vaccination with 3 doses of BNT162b2 (a), naïve dialysis patients 2-4 weeks after vaccination with 3 doses of BNT162b2 (b) or mRNA1273 (c). Data are representative of  $n = 2$  independent experiments.

**Supplementary Table 1.** Characteristics of single point mutations present in Omicron RBD relative to Wuhan-Hu-1 RBD.

|                                    | <b>RBD expr.</b>         | <b>hACE2 binding</b>     | <b>hACE2 binding</b> |
|------------------------------------|--------------------------|--------------------------|----------------------|
|                                    |                          | FACS                     | SPR                  |
|                                    | log fold-change          | log fold-change          | fold-change          |
| <b>G339D</b>                       | 0.3                      | 0.06                     |                      |
| <b>S371L</b>                       | -0.61                    | -0.14                    |                      |
| <b>S373P</b>                       | -0.22                    | -0.08                    |                      |
| <b>S375F</b>                       | -1.81                    | -0.55                    |                      |
| <b>K417N</b>                       | 0.1                      | -0.45                    | 0.3                  |
| <b>N440K</b>                       | -0.12                    | 0.07                     | 1.2                  |
| <b>G446S</b>                       | -0.4                     | -0.2                     |                      |
| <b>S477N</b>                       | 0.06                     | 0.06                     |                      |
| <b>T478K</b>                       | 0.02                     | 0.02                     | 1.2                  |
| <b>E484A</b>                       | -0.23                    | -0.07                    | 1.0 for E484K        |
| <b>Q493K</b>                       | 0.03                     | 0.05                     |                      |
| <b>G496S</b>                       | 0.12                     | -0.63                    |                      |
| <b>Q498R</b>                       | -0.1                     | -0.06                    |                      |
| <b>N501Y</b>                       | -0.14                    | 0.24                     | 6.2                  |
| <b>Y505H</b>                       | 0.16                     | -0.71                    |                      |
| <b>Total:</b>                      | -2.84<br>(692-fold loss) | -2.39<br>(245-fold loss) |                      |
| <b>K417N/<br/>E484K/<br/>N501Y</b> |                          |                          | 2.4                  |

Expression and FACS hACE2 binding data from<sup>22</sup>
